# Supplementary material
Source: PubMed Central journal article supplement (PMC5069171)
Supplement: NIHMS815735-supplement-01.pdf [file NIHMS815735-supplement-01.pdf]

## Supplemental data

**Supplemental Table 1A.** Dialysis prediction model: Full (C=0.885)

|                                   | Adj. Odds Ratio | Lower Confidence Limit | Upper Confidence Limit | p value |
|-----------------------------------|-----------------|------------------------|------------------------|---------|
| Age                               | 1.00            | 0.98                   | 1.02                   | 0.7266  |
| Male vs. Female                   | 1.01            | 0.55                   | 1.83                   | 0.9805  |
| White vs. Black                   | 1.01            | 0.46                   | 2.21                   | 0.9731  |
| Hispanic vs. Black                | 0.59            | 0.27                   | 1.26                   | 0.1728  |
| BMI                               | 0.94            | 0.90                   | 0.98                   | 0.0045  |
| Interstitial Fibrosis             | 1.04            | 1.02                   | 1.06                   | <0.0001 |
| Glomerulosclerosis                | 1.01            | 0.99                   | 1.03                   | 0.1937  |
| Creatinine                        | 1.32            | 1.12                   | 1.55                   | 0.0009  |
| GFR                               | 1.00            | 0.99                   | 1.01                   | 0.8803  |
| Proteinuria                       | 1.11            | 1.04                   | 1.19                   | 0.0029  |
| HTN                               | 2.70            | 1.21                   | 5.98                   | 0.0148  |
| IDDM                              | 1.85            | 0.76                   | 4.52                   | 0.1764  |
| CAD                               | 1.41            | 0.64                   | 3.13                   | 0.3942  |
| Nephropathy: DM vs. Autoimmune    | 1.18            | 0.31                   | 4.55                   | 0.8073  |
| Nephropathy: IgA vs. Autoimmune   | 0.93            | 0.28                   | 3.09                   | 0.9022  |
| Nephropathy: Other vs. Autoimmune | 1.28            | 0.47                   | 3.43                   | 0.6301  |

**Supplemental Table 1B.** Dialysis prediction models. Parsimonious 0.5 level (C=0.882)

|                                   | Adj. Odds Ratio | Lower Confidence Limit | Upper Confidence Limit | p value |
|-----------------------------------|-----------------|------------------------|------------------------|---------|
| BMI                               | 0.94            | 0.90                   | 0.98                   | 0.0037  |
| Interstitial Fibrosis             | 1.04            | 1.02                   | 1.06                   | <0.0001 |
| Glomerulosclerosis                | 1.01            | 0.99                   | 1.02                   | 0.2202  |
| Creatinine                        | 1.33            | 1.19                   | 1.50                   | <0.0001 |
| Proteinuria                       | 1.11            | 1.04                   | 1.18                   | 0.0027  |
| HTN                               | 2.63            | 1.21                   | 5.70                   | 0.0143  |
| IDDM                              | 2.05            | 0.87                   | 4.86                   | 0.1024  |
| CAD                               | 1.34            | 0.64                   | 2.82                   | 0.434   |
| Nephropathy: DM vs. Autoimmune    | 1.25            | 0.35                   | 4.45                   | 0.7299  |
| Nephropathy: IgA vs. Autoimmune   | 0.98            | 0.31                   | 3.15                   | 0.9791  |
| Nephropathy: Other vs. Autoimmune | 1.27            | 0.49                   | 3.29                   | 0.6228  |

**Supplemental Table 1A-B.** Parsimonious prediction model for reaching dialysis. See Methods for a detailed description of the prediction model development. (BMI, Body Mass Index; GFR, Glomerular Filtration Rate; HTN, hypertension; IDDM, insulin dependent diabetes; CAD, coronary artery disease; DM, diabetes mellitus; IgA, Immunoglobulin A; DM, diabetes mellitus; IgA, Immunoglobulin A)

**Supplemental Table 2A.** Dialysis prediction model with GFR: Full (C=0.888)

|                                   | <b>Adj.<br/>Odds<br/>Ratio</b> | <b>Lower<br/>Confidence Limit</b> | <b>Upper<br/>Confidence Limit</b> | <b>p-value</b> |
|-----------------------------------|--------------------------------|-----------------------------------|-----------------------------------|----------------|
| Age                               | 0.99                           | 0.97                              | 1.01                              | 0.477          |
| Male vs. Female                   | 1.32                           | 0.72                              | 2.43                              | 0.369          |
| White vs. Black                   | 0.91                           | 0.42                              | 1.98                              | 0.809          |
| Hispanic vs. Black                | 0.54                           | 0.25                              | 1.16                              | 0.114          |
| BMI                               | 0.94                           | 0.90                              | 0.98                              | 0.005          |
| Interstitial Fibrosis             | 1.04                           | 1.02                              | 1.06                              | <0.001         |
| Glomerulosclerosis                | 1.01                           | 0.99                              | 1.02                              | 0.282          |
| GFR: 30-59 vs. 60+                | 0.83                           | 0.35                              | 1.97                              | 0.673          |
| GFR: 15-29 vs. 60+                | 2.74                           | 1.18                              | 6.37                              | 0.019          |
| GFR: <15 vs. 60+                  | 5.09                           | 2.00                              | 12.95                             | 0.001          |
| Proteinuria                       | 1.10                           | 1.03                              | 1.18                              | 0.005          |
| HTN                               | 2.70                           | 1.22                              | 5.95                              | 0.014          |
| IDDM                              | 1.72                           | 0.69                              | 4.32                              | 0.248          |
| CAD                               | 1.59                           | 0.71                              | 3.56                              | 0.259          |
| Nephropathy: DM vs. Autoimmune    | 1.10                           | 0.28                              | 4.37                              | 0.891          |
| Nephropathy: IgA vs. Autoimmune   | 0.91                           | 0.26                              | 3.16                              | 0.884          |
| Nephropathy: Other vs. Autoimmune | 1.21                           | 0.45                              | 3.26                              | 0.71           |

**Supplemental Table 2B.** Dialysis prediction model with GFR: Parsimonious 0.5 level (C=0.882)

|                       | Adj. Odds Ratio | Lower Confidence Limit | Upper Confidence Limit | p-value |
|-----------------------|-----------------|------------------------|------------------------|---------|
| Male vs. Female       | 1.26            | 0.70                   | 2.25                   | 0.446   |
| BMI                   | 0.94            | 0.90                   | 0.98                   | 0.003   |
| Interstitial Fibrosis | 1.04            | 1.02                   | 1.06                   | <0.001  |
| Glomerulosclerosis    | 1.01            | 0.99                   | 1.02                   | 0.315   |
| GFR: 30-59 vs. 60+    | 0.76            | 0.33                   | 1.75                   | 0.525   |
| GFR: 15-29 vs. 60+    | 2.66            | 1.18                   | 6.01                   | 0.019   |
| GFR: <15 vs. 60+      | 4.59            | 1.89                   | 11.19                  | 0.001   |
| Proteinuria           | 1.10            | 1.03                   | 1.17                   | 0.005   |
| HTN                   | 2.46            | 1.15                   | 5.26                   | 0.02    |
| IDDM                  | 2.03            | 0.97                   | 4.25                   | 0.06    |
| CAD                   | 1.42            | 0.67                   | 3.01                   | 0.355   |

**Supplemental Table 2C.** Dialysis prediction model with GFR: Parsimonious 0.2 level (C=0.881)

|                       | Adj. Odds Ratio | Lower Confidence Limit | Upper Confidence Limit | p-value |
|-----------------------|-----------------|------------------------|------------------------|---------|
| BMI                   | 0.94            | 0.90                   | 0.98                   | 0.002   |
| Interstitial Fibrosis | 1.04            | 1.03                   | 1.06                   | <0.001  |
| GFR: 30-59 vs. 60+    | 0.86            | 0.39                   | 1.92                   | 0.714   |
| GFR: 15-29 vs. 60+    | 2.90            | 1.31                   | 6.46                   | 0.009   |
| GFR: <15 vs. 60+      | 5.23            | 2.19                   | 12.48                  | <0.001  |
| Proteinuria           | 1.09            | 1.02                   | 1.16                   | 0.011   |
| HTN                   | 2.89            | 1.40                   | 5.99                   | 0.004   |
| IDDM                  | 2.10            | 1.02                   | 4.35                   | 0.045   |

**Supplemental Table 2A-C.** Parsimonious prediction model for reaching dialysis according to GFR. See Methods for a detailed description of the prediction model development.

(BMI, Body Mass Index; GFR, Glomerular Filtration Rate; HTN, hypertension; IDDM, insulin dependent diabetes mellitus; CAD, coronary artery disease; DM, diabetes mellitus; IgA, Immunoglobulin A)

**Supplemental Table 3.** Predicted probability of dialysis based on interstitial fibrosis alone model in subgroups of patients

| Characteristic     | Frequency<br>N(%) | Dialysis<br>(N=136)<br>Mean±SD<br>Median (Range) | No Dialysis<br>(N=298)<br>Mean±SD<br>Median (Range) | p-value |
|--------------------|-------------------|--------------------------------------------------|-----------------------------------------------------|---------|
| <b>Age</b>         |                   |                                                  |                                                     |         |
| 17-29              | 88 (20.3%)        | 0.52±0.28<br>0.51 (0.08-0.93)                    | 0.16±0.16<br>0.10 (0.06-0.80)                       | <0.001  |
| 30-49              | 177 (40.8%)       | 0.53±0.28<br>0.57 (0.08-0.94)                    | 0.19±0.17<br>0.12 (0.06-0.84)                       | <0.001  |
| 50-69              | 138 (31.8%)       | 0.54±0.25<br>0.51 (0.10-0.90)                    | 0.29±0.22<br>0.23 (0.06-0.84)                       | <0.001  |
| 70+                | 31 (7.1%)         | 0.44±0.26<br>0.37 (0.08-0.84)                    | 0.30±0.23<br>0.25 (0.07-0.84)                       | 0.127   |
| <b>Gender</b>      |                   |                                                  |                                                     |         |
| Male               | 226 (52.1%)       | 0.55±0.25<br>0.51 (0.08-0.94)                    | 0.25±0.20<br>0.16 (0.06-0.84)                       | <0.001  |
| Female             | 208 (47.9%)       | 0.48±0.29<br>0.37 (0.08-0.90)                    | 0.19±0.18<br>0.10 (0.06-0.84)                       | <0.001  |
| <b>Race</b>        |                   |                                                  |                                                     |         |
| White              | 96 (22.1%)        | 0.42±0.24<br>0.37 (0.13-0.94)                    | 0.18±0.16<br>0.12 (0.06-0.80)                       | <0.001  |
| Black              | 183 (42.2%)       | 0.53±0.27<br>0.51 (0.08-0.90)                    | 0.25±0.23<br>0.16 (0.06-0.84)                       | <0.001  |
| Hispanic           | 95 (21.9%)        | 0.62±0.24<br>0.76 (0.16-0.93)                    | 0.20±0.18<br>0.13 (0.06-0.76)                       | <0.001  |
| Other              | 60 (13.8%)        | 0.49±0.28<br>0.37 (0.08-0.90)                    | 0.21±0.16<br>0.16 (0.06-0.70)                       | <0.001  |
| <b>BMI</b>         |                   |                                                  |                                                     |         |
| Normal (18.5-25)   | 134 (31.0%)       | 0.50±0.27<br>0.51 (0.08-0.93)                    | 0.20±0.17<br>0.16 (0.06-0.80)                       | <0.001  |
| Overweight (25-30) | 144 (33.3%)       | 0.57±0.25<br>0.61 (0.14-0.90)                    | 0.21±0.17<br>0.16 (0.06-0.84)                       | <0.001  |
| Obese (>30)        | 154 (35.6%)       | 0.51±0.26<br>0.51 (0.08-0.94)                    | 0.24±0.22<br>0.14 (0.06-0.84)                       | <0.001  |
| <b>Nephropathy</b> |                   |                                                  |                                                     |         |
| Autoimmune         | 124 (28.6%)       | 0.44±0.28<br>0.37 (0.08-0.84)                    | 0.17±0.14<br>0.10 (0.06-0.70)                       | <0.001  |
| IgA                | 58 (13.4%)        | 0.58±0.29<br>0.64 (0.14-0.94)                    | 0.17±0.14<br>0.13 (0.06-0.76)                       | <0.001  |
| Diabetic           | 42 (9.7%)         | 0.55±0.26<br>0.51 (0.16-0.90)                    | 0.44±0.30<br>0.25 (0.10-0.84)                       | 0.202   |
| Other              | 210 (48.4%)       | 0.53±0.25<br>0.57 (0.08-0.90)                    | 0.23±0.20<br>0.16 (0.06-0.84)                       | <0.001  |
| <b>HTN</b>         |                   |                                                  |                                                     |         |
| Yes                | 298 (68.8%)       | 0.54±0.26<br>0.51 (0.08-0.94)                    | 0.26±0.21<br>0.16 (0.06-0.84)                       | <0.001  |
| No                 | 135 (31.2%)       | 0.41±0.30<br>0.28 (0.08-0.90)                    | 0.15±0.14<br>0.10 (0.06-0.84)                       | <0.001  |
| <b>IDDM</b>        |                   |                                                  |                                                     |         |
| Yes                | 59 (13.6%)        | 0.49±0.25<br>0.51 (0.08-0.90)                    | 0.36±0.27<br>0.25 (0.08-0.84)                       | 0.062   |
| No                 | 374 (86.4%)       | 0.53±0.27<br>0.51 (0.08-0.94)                    | 0.20±0.18<br>0.14 (0.06-0.84)                       | <0.001  |
| <b>NIDDM</b>       |                   |                                                  |                                                     |         |

| Characteristic | Frequency<br>N(%) | Dialysis<br>(N=136)<br>Mean±SD<br>Median (Range) | No Dialysis<br>(N=298)<br>Mean±SD<br>Median (Range) | p-value |
|----------------|-------------------|--------------------------------------------------|-----------------------------------------------------|---------|
| Yes            | 42 (9.7%)         | 0.57±0.22<br>0.51 (0.16-0.94)                    | 0.26±0.22<br>0.20 (0.06-0.84)                       | <0.001  |
| No             | 391 (90.3%)       | 0.52±0.27<br>0.51 (0.08-0.93)                    | 0.21±0.19<br>0.14 (0.06-0.84)                       | <0.001  |
| CAD/PVD/CVA    |                   |                                                  |                                                     |         |
| Yes            | 63 (14.6%)        | 0.51±0.27<br>0.44 (0.08-0.90)                    | 0.30±0.26<br>0.16 (0.07-0.84)                       | 0.003   |
| No             | 369 (85.4%)       | 0.52±0.26<br>0.51 (0.08-0.94)                    | 0.21±0.18<br>0.14 (0.06-0.84)                       | <0.001  |
| AI disease     |                   |                                                  |                                                     |         |
| Yes            | 127 (29.4%)       | 0.43±0.28<br>0.37 (0.08-0.84)                    | 0.17±0.14<br>0.10 (0.06-0.70)                       | <0.001  |
| No             | 305 (70.6%)       | 0.55±0.26<br>0.64 (0.08-0.94)                    | 0.24±0.21<br>0.16 (0.06-0.84)                       | <0.001  |
| GFR            |                   |                                                  |                                                     |         |
| 60+            | 172 (39.6%)       | 0.25±0.20<br>0.16 (0.08-0.84)                    | 0.14±0.12<br>0.10 (0.06-0.70)                       | 0.001   |
| 30-59          | 105 (24.2%)       | 0.42±0.21<br>0.37 (0.13-0.80)                    | 0.30±0.20<br>0.25 (0.08-0.84)                       | 0.011   |
| 15-29          | 85 (19.6%)        | 0.56±0.25<br>0.64 (0.10-0.90)                    | 0.38±0.24<br>0.31 (0.07-0.84)                       | 0.001   |
| <15            | 72 (16.6%)        | 0.63±0.24<br>0.70 (0.16-0.94)                    | 0.22±0.21<br>0.13 (0.06-0.84)                       | <0.001  |

**Supplemental Table 3.** Predicted probability of dialysis based on interstitial fibrosis alone model in subgroups of patients. Data presented as Mean ± SD, Median (Range). P<0.05 was considered significant.

(BMI, Body Mass Index; IgA, Immunoglobulin A; GFR, Glomerular Filtration Rate; MDRD, Modification of Diet in Renal Disease; HTN, hypertension; IDDM, insulin dependent diabetes mellitus; NIDDM, non-insulin dependent diabetes mellitus; CAD, coronary artery disease; PVD, peripheral vascular disease; CVA, cerebrovascular accident; AI, autoimmune; SD, standard deviation)

**Supplemental Table 4.** Dialysis prediction models in non-diabetics and younger than 70 years old

Full (C=0.912)

|                                   | <b>Adj. Odds Ratio</b> | <b>Lower Confidence Limit</b> | <b>Upper Confidence Limit</b> | <b>p value</b> |
|-----------------------------------|------------------------|-------------------------------|-------------------------------|----------------|
| Interstitial Fibrosis             | 1.05                   | 1.03                          | 1.07                          | <0.0001        |
| Age                               | 1.00                   | 0.97                          | 1.03                          | 0.9272         |
| Male vs. Female                   | 1.17                   | 0.55                          | 2.51                          | 0.6708         |
| White vs. Black                   | 1.13                   | 0.40                          | 3.17                          | 0.8045         |
| Hispanic vs. Black                | 0.59                   | 0.23                          | 1.53                          | 0.2859         |
| BMI                               | 0.95                   | 0.90                          | 1.01                          | 0.1229         |
| Glomerulosclerosis                | 1.01                   | 0.99                          | 1.03                          | 0.0834         |
| Creatinine                        | 1.43                   | 1.18                          | 1.73                          | 0.0002         |
| GFR                               | 1.00                   | 0.99                          | 1.01                          | 0.4150         |
| Proteinuria                       | 1.14                   | 1.05                          | 1.25                          | 0.0021         |
| HTN                               | 2.41                   | 0.95                          | 6.06                          | 0.0618         |
| CAD                               | 1.61                   | 0.54                          | 4.85                          | 0.3894         |
| Nephropathy: IgA vs. Autoimmune   | 1.24                   | 0.40                          | 3.81                          | 0.7063         |
| Nephropathy: Other vs. Autoimmune | 0.62                   | 0.27                          | 1.44                          | 0.2740         |

Parsimonious 0.5 level (C=0.911)

|                                   | <b>Adj. Odds Ratio</b> | <b>Lower Confidence Limit</b> | <b>Upper Confidence Limit</b> | <b>p value</b> |
|-----------------------------------|------------------------|-------------------------------|-------------------------------|----------------|
| Interstitial Fibrosis             | 1.05                   | 1.03                          | 1.07                          | <0.0001        |
| White vs. Black                   | 1.19                   | 0.44                          | 3.18                          | 0.7271         |
| BMI                               | 0.95                   | 0.90                          | 1.01                          | 0.1083         |
| Glomerulosclerosis                | 1.01                   | 0.99                          | 1.03                          | 0.0751         |
| Creatinine                        | 1.43                   | 1.19                          | 1.73                          | 0.0001         |
| GFR                               | 1.00                   | 0.993                         | 1.01                          | 0.4072         |
| Proteinuria                       | 1.14                   | 1.057                         | 1.259                         | 0.0022         |
| HTN                               | 2.45                   | 0.99                          | 6.08                          | 0.0516         |
| CAD                               | 1.70                   | 0.61                          | 4.77                          | 0.3086         |
| Nephropathy: IgA vs. Autoimmune   | 1.29                   | 0.42                          | 3.89                          | 0.6489         |
| Nephropathy: Other vs. Autoimmune | 0.65                   | 0.28                          | 1.47                          | 0.3047         |

Parsimonious 0.2 level (C=0.905)

|                       | <b>Adj. Odds Ratio</b> | <b>Lower Confidence Limit</b> | <b>Upper Confidence Limit</b> | <b>p value</b> |
|-----------------------|------------------------|-------------------------------|-------------------------------|----------------|
| Interstitial Fibrosis | 1.04                   | 1.02                          | 1.06                          | <0.0001        |
| BMI                   | 0.94                   | 0.89                          | 1.00                          | 0.0516         |
| Glomerulosclerosis    | 1.01                   | 0.99                          | 1.03                          | 0.1595         |
| Creatinine            | 1.35                   | 1.19                          | 1.53                          | <0.0001        |
| Protein               | 1.12                   | 1.03                          | 1.22                          | 0.0060         |
| HTN                   | 2.52                   | 1.05                          | 6.04                          | 0.0374         |

TA alone (C=0.866)

|                       | <b>Adj. Odds Ratio</b> | <b>Lower Confidence Limit</b> | <b>Upper Confidence Limit</b> | <b>p value</b> |
|-----------------------|------------------------|-------------------------------|-------------------------------|----------------|
| Interstitial Fibrosis | 1.06                   | 1.05                          | 1.08                          | <0.0001        |

**Supplemental Table 4.** Parsimonious prediction model for time to initiation of dialysis in non DM patients under 70 years old. See Methods for a detailed description of the prediction model development.

(BMI, Body Mass Index; GFR, Glomerular Filtration Rate; HTN, hypertension; CAD, coronary artery disease; DM, diabetes mellitus; IgA, Immunoglobulin A)



**Supplemental Table 5A.** Time to event (Dialysis or Death) analysis

| <b>Had Events Up to:</b> | <b>Interstitial Fibrosis: 0-24%</b> | <b>Interstitial Fibrosis: 25-49%</b> | <b>Interstitial Fibrosis: 50+%</b> |
|--------------------------|-------------------------------------|--------------------------------------|------------------------------------|
| 1 month                  | 1.0 (0.2-3.4)                       | 6.9 (3.2-12.4)                       | 18.7 (12.3-26.2)                   |
| 6 months                 | 2.1 (0.7-5.0)                       | 10.4 (5.7-16.8)                      | 35.4 (26.8-44.1)                   |
| 1 year                   | 4.5 (2.1-8.2)                       | 12.4 (7.1-19.2)                      | 46.7 (37.3-55.6)                   |
| 2 years                  | 7.8 (4.4-12.6)                      | 20.1 (13.0-28.4)                     | 59.3 (49.2-68.0)                   |
| 5 years                  | 12.3 (7.5-18.4)                     | 36.2 (25.9-46.7)                     | 81.7 (71.3-88.7)                   |
| 10 years                 | 27.5 (17.0-39.0)                    | 64.2 (47.3-77.0)                     | 90.9 (74.2-97.0)                   |

**Supplemental Table 5B.** Dialysis or death risk factors analysis

|                                       | <b>Adjusted HR</b> | <b>Lower Confidence Limit</b> | <b>Upper Confidence Limit</b> | <b>p-value</b> |
|---------------------------------------|--------------------|-------------------------------|-------------------------------|----------------|
| Interstitial Fibrosis: 25-49 vs. 0-24 | 1.99               | 1.10                          | 3.60                          | 0.023          |
| Interstitial Fibrosis: 50+ vs. 0-24   | 5.76               | 3.04                          | 10.91                         | <0.001         |
|                                       |                    |                               |                               |                |
| Age                                   | 1.01               | 1.00                          | 1.02                          | 0.164          |
| Male vs. Female                       | 1.22               | 0.83                          | 1.80                          | 0.318          |
| White vs. Black                       | 1.23               | 0.73                          | 2.08                          | 0.437          |
| Hispanic vs. Black                    | 0.88               | 0.54                          | 1.45                          | 0.626          |
| BMI                                   | 0.96               | 0.93                          | 0.99                          | 0.003          |
| Glomerulosclerosis                    | 1.00               | 1.00                          | 1.01                          | 0.352          |
| GFR: 30-59 vs. 60+                    | 1.05               | 0.56                          | 1.96                          | 0.874          |
| GFR: 15-29 vs. 60+                    | 2.23               | 1.22                          | 4.06                          | 0.009          |
| GFR: <15 vs. 60+                      | 7.30               | 4.03                          | 13.24                         | <0.001         |
| Proteinuria: 3.5+ vs. <3.5            | 1.83               | 1.28                          | 2.62                          | 0.001          |
| HTN                                   | 1.82               | 1.02                          | 3.25                          | 0.045          |
| CAD                                   | 1.16               | 0.74                          | 1.81                          | 0.528          |
| Nephropathy: Diabetic vs. Autoimmune  | 1.00               | 0.52                          | 1.92                          | 0.993          |
| Nephropathy: IgA vs. Autoimmune       | 0.88               | 0.41                          | 1.90                          | 0.739          |
| Nephropathy: Other vs. Autoimmune     | 0.68               | 0.36                          | 1.26                          | 0.219          |

**Supplemental Table 5A.** Time to event (dialysis or death) analysis. Life table estimates of dialysis or death for 10-year follow-up from biopsy by severity of fibrosis at biopsy.

**Supplemental Table 5B.** Dialysis or death risk factor analysis. Cox proportional hazard model for time to dialysis or death.

(BMI, Body Mass Index; GFR, Glomerular Filtration Rate; HTN, hypertension; CAD, coronary artery disease; IgA, Immunoglobulin A)

**Supplemental Table 6A.** Dialysis prediction model with fibrosis as categorical variable: Full (C=0.878, H-L p=0.399)

|                                   | <b>Adj. Odds Ratio</b> | <b>Lower Confidence Limit</b> | <b>Upper Confidence Limit</b> | <b>p-value</b> |
|-----------------------------------|------------------------|-------------------------------|-------------------------------|----------------|
| Age                               | 0.997                  | 0.977                         | 1.017                         | 0.772          |
| Male vs. Female                   | 0.961                  | 0.532                         | 1.736                         | 0.895          |
| White vs. Black                   | 1.039                  | 0.483                         | 2.232                         | 0.922          |
| Hispanic vs. Black                | 0.609                  | 0.292                         | 1.269                         | 0.185          |
| BMI                               | 0.942                  | 0.902                         | 0.983                         | 0.006          |
| TA: 25-49 vs. <25                 | 2.701                  | 1.299                         | 5.616                         | 0.008          |
| TA: 50+ vs. <25                   | 5.976                  | 2.620                         | 13.631                        | <0.001         |
| FGG                               | 1.015                  | 1.001                         | 1.030                         | 0.038          |
| Creatinine                        | 1.351                  | 1.199                         | 1.522                         | <0.001         |
| Protein                           | 1.112                  | 1.041                         | 1.189                         | 0.002          |
| HTN                               | 2.674                  | 1.223                         | 5.845                         | 0.014          |
| IDDM                              | 1.824                  | 0.750                         | 4.436                         | 0.185          |
| CAD                               | 1.559                  | 0.709                         | 3.430                         | 0.269          |
| Nephropathy: DM vs. Autoimmune    | 1.263                  | 0.383                         | 4.171                         | 0.701          |
| Nephropathy: IGA vs. Autoimmune   | 1.420                  | 0.540                         | 3.737                         | 0.477          |
| Nephropathy: Other vs. Autoimmune | 0.890                  | 0.237                         | 3.341                         | 0.862          |

**Supplemental Table 6B.** Dialysis prediction model with fibrosis as categorical variable: Parsimonious 0.5 level (C=0.876, H-L p=0.178)

|                                   | <b>Adj. Odds Ratio</b> | <b>Lower Confidence Limit</b> | <b>Upper Confidence Limit</b> | <b>p-value</b> |
|-----------------------------------|------------------------|-------------------------------|-------------------------------|----------------|
| BMI                               | 0.942                  | 0.902                         | 0.983                         | 0.006          |
| TA: 25-49 vs. <25                 | 2.668                  | 1.291                         | 5.512                         | 0.008          |
| TA: 50+ vs. <25                   | 6.001                  | 2.644                         | 13.620                        | <0.001         |
| FGG                               | 1.014                  | 1.000                         | 1.028                         | 0.051          |
| Creatinine                        | 1.356                  | 1.206                         | 1.525                         | <0.001         |
| Protein                           | 1.110                  | 1.040                         | 1.185                         | 0.002          |
| HTN                               | 2.612                  | 1.218                         | 5.601                         | 0.014          |
| IDDM                              | 1.972                  | 0.829                         | 4.691                         | 0.125          |
| CAD                               | 1.496                  | 0.718                         | 3.120                         | 0.282          |
| Nephropathy: DM vs. Autoimmune    | 1.203                  | 0.378                         | 3.824                         | 0.754          |
| Nephropathy: IGA vs. Autoimmune   | 1.379                  | 0.541                         | 3.514                         | 0.501          |
| Nephropathy: Other vs. Autoimmune | 0.872                  | 0.249                         | 3.054                         | 0.831          |

**Supplemental Table 6C.** Dialysis prediction model with fibrosis as categorical variable: Parsimonious 0.2 level (C=0.872, H-L p=0.345)

|                   | <b>Adj. Odds Ratio</b> | <b>Lower Confidence Limit</b> | <b>Upper Confidence Limit</b> | <b>p-value</b> |
|-------------------|------------------------|-------------------------------|-------------------------------|----------------|
| BMI               | 0.939                  | 0.901                         | 0.980                         | 0.004          |
| TA: 25-49 vs. <25 | 2.584                  | 1.253                         | 5.330                         | 0.010          |
| TA: 50+ vs. <25   | 5.661                  | 2.518                         | 12.727                        | <0.001         |
| FGG               | 1.013                  | 1.000                         | 1.027                         | 0.056          |
| Creatinine        | 1.352                  | 1.210                         | 1.511                         | <0.001         |
| Protein           | 1.101                  | 1.033                         | 1.173                         | 0.003          |
| HTN               | 2.773                  | 1.322                         | 5.819                         | 0.007          |
| IDDM              | 2.417                  | 1.200                         | 4.866                         | 0.013          |

**Supplemental Table 6A-C.** Parsimonious prediction model for reaching dialysis using interstitial fibrosis as a categorical variable. (BMI, Body Mass Index; GFR, Glomerular Filtration Rate; HTN, hypertension; IDDM, insulin dependent diabetes mellitus; CAD, coronary artery disease; DM, diabetes mellitus; IgA, Immunoglobulin A)

**Supplemental Figure 1.** Kaplan-Meier analysis of time-to-dialysis or death according to the level of interstitial fibrosis

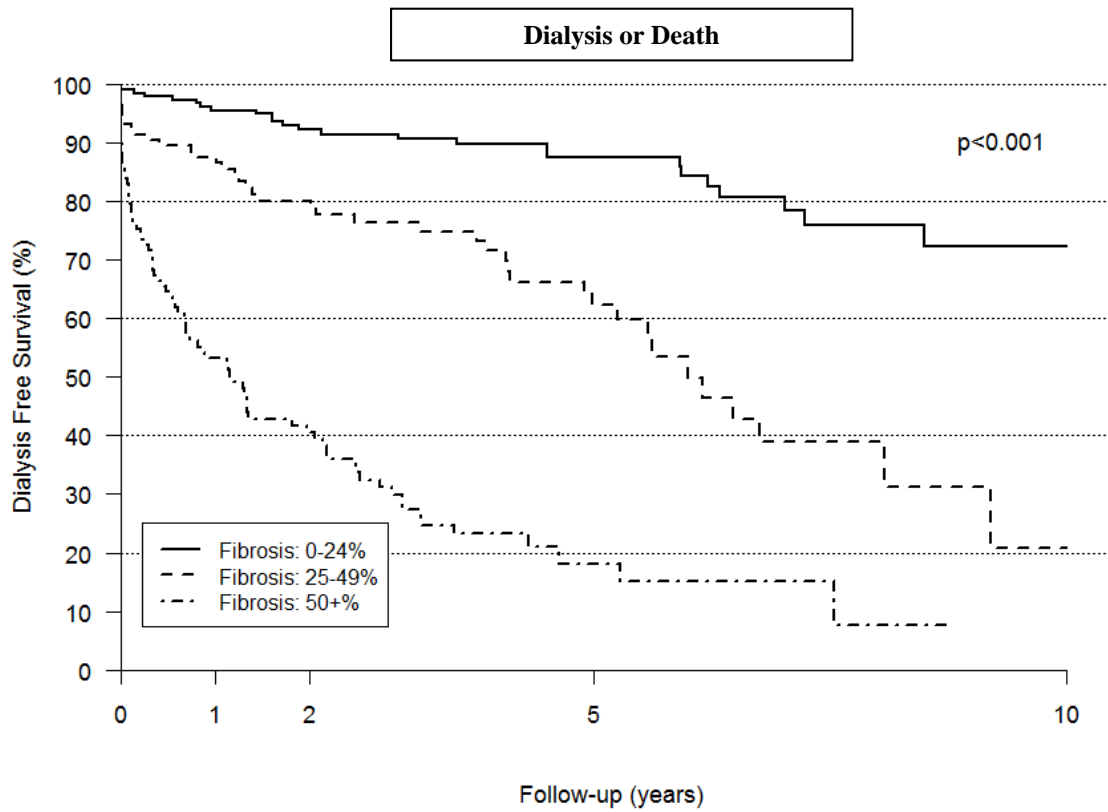

| Sample | 0-24% | 25-49% | 50+% | 71 | 31 | 6 | 3 | 1 | 0 |
|--------|-------|--------|------|----|----|---|---|---|---|
| 0-24%  | 199   | 153    | 128  | 71 | 31 | 6 | 3 | 1 | 0 |
| 25-49% | 117   | 85     | 67   | 31 | 6  | 3 | 1 | 0 | 0 |
| 50+%   | 118   | 54     | 36   | 6  | 3  | 3 | 0 | 0 | 0 |

**Supplemental Figure 1.** Stratified Kaplan-Meier analysis of time-to-dialysis or death according to the level of interstitial fibrosis.
